# Supplementary material for: Synergistic and low adverse effect cancer immunotherapy by immunogenic chemotherapy and locally expressed PD-L1 trap
Source: PubMed Central journal article supplement (PMC5993831; doi:10.1038/s41467-018-04605-x), 2018-06-08
Supplement: 41467_2018_4605_MOESM1_ESM.pdf [file 41467_2018_4605_MOESM1_ESM.pdf]

Supporting materials for

**Synergistic and Low Adverse Effect Cancer Immunotherapy by Immunogenic  
Chemotherapy and Locally Expressed PD-L1 Trap**

Song et al.

# **Synergistic and Low Adverse Effect Cancer Immunotherapy by Immunogenic Chemotherapy and Locally Expressed PD-L1 Trap**

Wantong Song<sup>1,4</sup>, Limei Shen<sup>1</sup>, Ying Wang<sup>1</sup>, Qi Liu<sup>1</sup>, Tyler J. Goodwin<sup>1</sup>, Jingjing Li<sup>2</sup>, Olekasandra Dorosheva<sup>2</sup>, Tianzhou Liu<sup>5</sup>, Rihe Liu<sup>2,3,\*</sup>, and Leaf Huang<sup>1,\*</sup>

<sup>1</sup>Division of Pharmacoengineering and Molecular Pharmaceutics, Eshelman School of Pharmacy, University of North Carolina at Chapel Hill, Chapel Hill, NC 27599, USA.

<sup>2</sup>Division of Chemical Biology and Medicinal Chemistry, Eshelman School of Pharmacy, University of North Carolina at Chapel Hill, Chapel Hill, NC 27599, USA.

<sup>3</sup>Carolina Center for Genome Sciences, University of North Carolina at Chapel Hill, Chapel Hill, NC 27599, USA.

<sup>4</sup>Key Laboratory of Polymer Ecomaterials, Changchun Institute of Applied Chemistry, Chinese Academy of Sciences, Changchun, 130022, P. R. China.

<sup>5</sup>Department of Gastrointestinal Surgery, The Second Hospital of Jilin University, Changchun, 130041, P. R. China

\* Correspondence and requests for materials should be addressed to R.L. ([rliu@email.unc.edu](mailto:rliu@email.unc.edu)) or to L.H. ([leafh@email.unc.edu](mailto:leafh@email.unc.edu)).

## **Supplementary file includes:**

Supplementary Figures 1 to 13.

Supplementary Tables 1 to 2.

Supplementary Note 1.

## Supplementary Figures

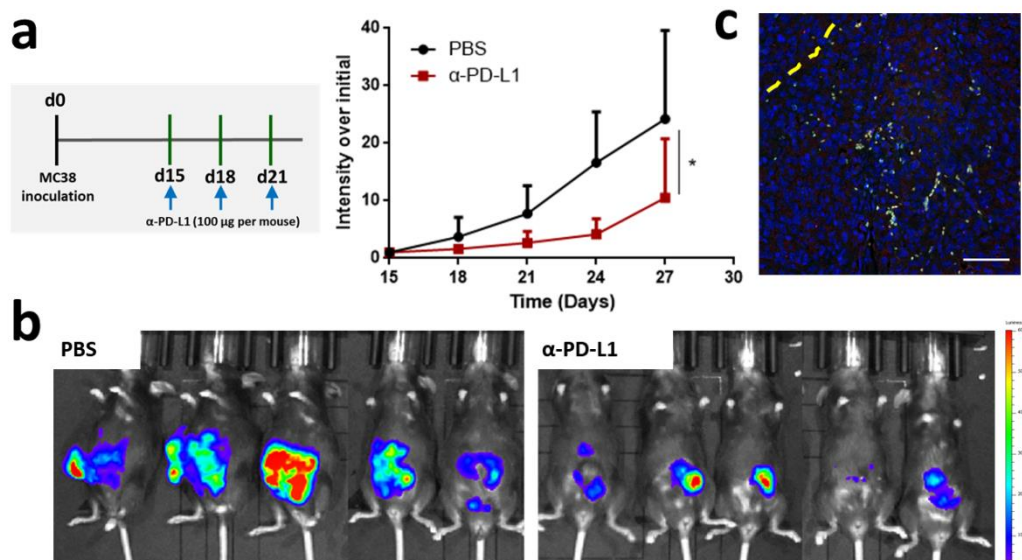

**Supplementary Figure 1.** Anti-PD-L1 mAb therapy in orthotopic MC38 model. **a** Treatment scheme and tumor growth curves of orthotopic MC38 tumors in PBS and  $\alpha$ -PD-L1 treated groups ( $n = 5$  mice per group). **b** IVIS images of the orthotopic MC38 tumors on day 27. **c** Immunofluorescence staining of orthotopic MC38 tumors in PBS group using DAPI (blue) and anti-CD3 antibody (red). Yellow dotted line indicates the border between intestinal mucosa and the orthotopic tumor. Scale bar represents 50  $\mu$ m. Significant differences were assessed in **a** using two-way ANOVA. Results are presented as mean (SD). \*  $p < 0.05$ .

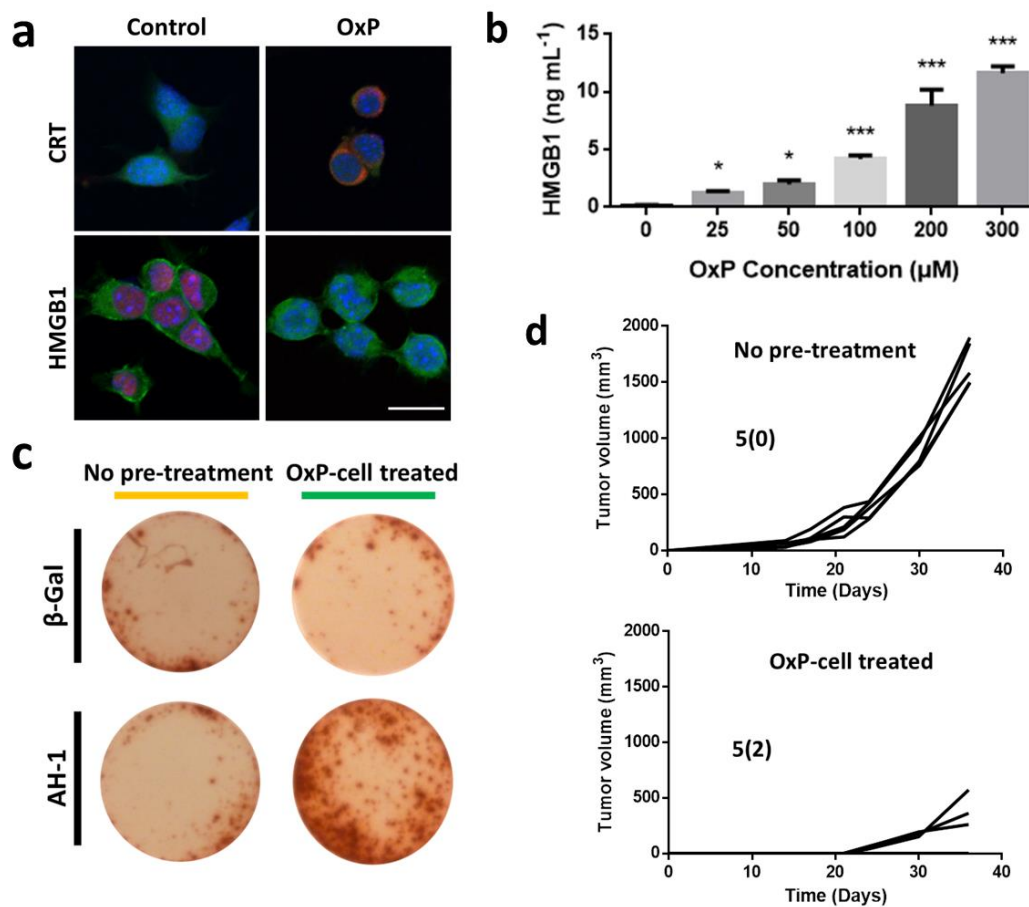

**Supplementary Figure 2.** OxP induced ICD in CT26-FL3 cells. **(a)** CRT exposure and HMGB1 release test of CT26-FL3 cells with or without incubation with OxP. Scale bar represents 20  $\mu\text{m}$ . **(b)** ELISA detection of HMGB1 release in the supernatants of CT26-FL3 cells treated with different concentrations of OxP for 24 h ( $n = 3$ ). **(c)** ELISpot test of the splenocytes of mice injected with or without OxP incubated CT26-FL3 cells. **(d)** OxP incubated CT26-FL3 cells efficiently vaccinated mice against re-challenging of CT26-FL3 cells. In the mice without pre-treatment, 0 out of 5 mice were tumor free. In the OxP incubated cells vaccinated group, 2 out of 5 mice were tumor free, and the tumor growth rate is slower. Significant differences were assessed in **b** using t test. Results are presented as mean (SD). \* $p < 0.05$ , \*\*\* $p < 0.001$ .

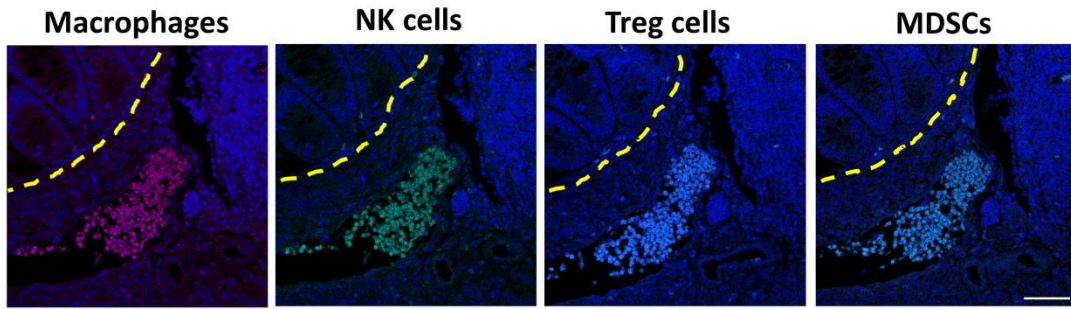

**Supplementary Figure 3.** Immunofluorescence staining of the orthotopic CT26-FL3 tumors after OxP treatment using DAPI (blue), anti-F4/80 (red), anti-NK1.1 (green), anti-CD4 (red) and anti-FoxP3 (green), anti-CD11b (green) and anti-Gr-1 (red). Yellow dotted line indicates the border between intestinal mucosa and the orthotopic tumor. Scale bar represents 50  $\mu\text{m}$ .

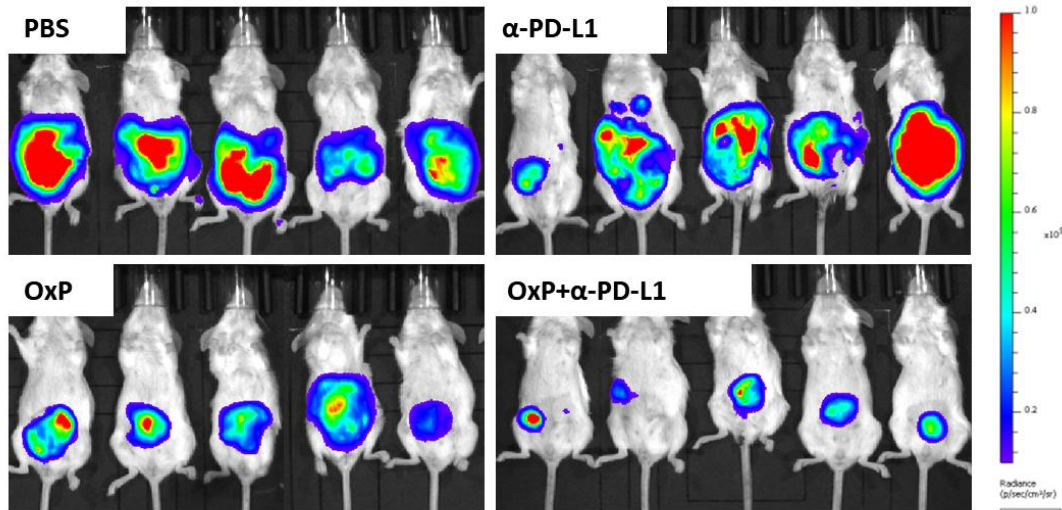

**Supplementary Figure 4.** IVIS images of the orthotopic CT26-FL3 tumor-bearing mice after various treatments on day 33.

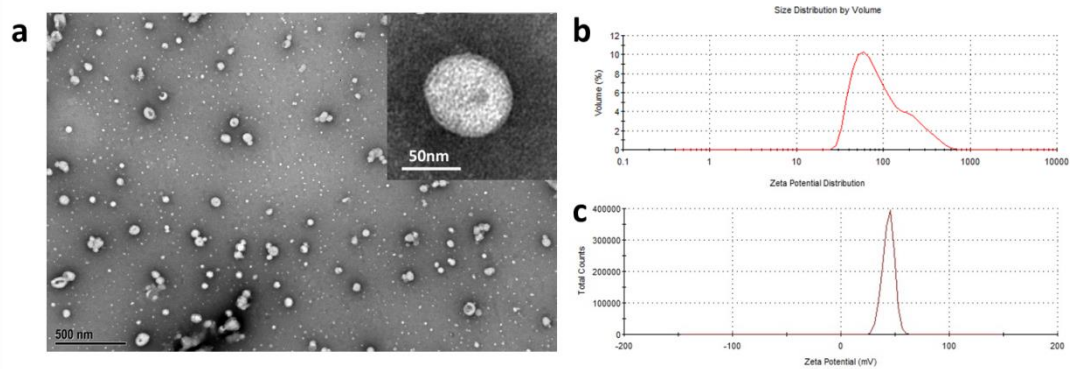

**Supplementary Figure 5.** Characterization of the prepared LPD-PD-L1 trap plasmid nanoparticles. **a** TEM images. **b** Volume average size detected by DLS. **c** Zeta potential.

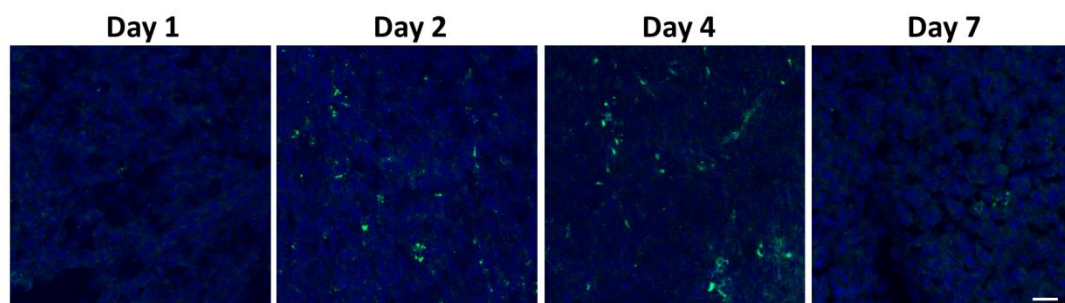

**Supplementary Figure 6.** GFP expression in tumor tissues on day 1, 2, 4 and 7. GFP plasmid loaded LPD nanoparticles were given on day 0 at a dose of 50  $\mu$ g plasmid per mouse. Scale bar represents 20  $\mu$ m.

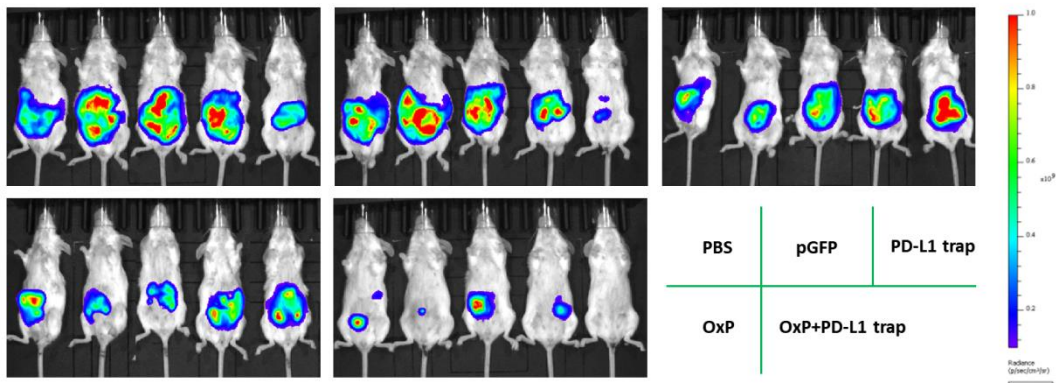

**Supplementary Figure 7.** IVIS images of the orthotopic CT26-FL3 tumor-bearing mice after various treatments on day 33.

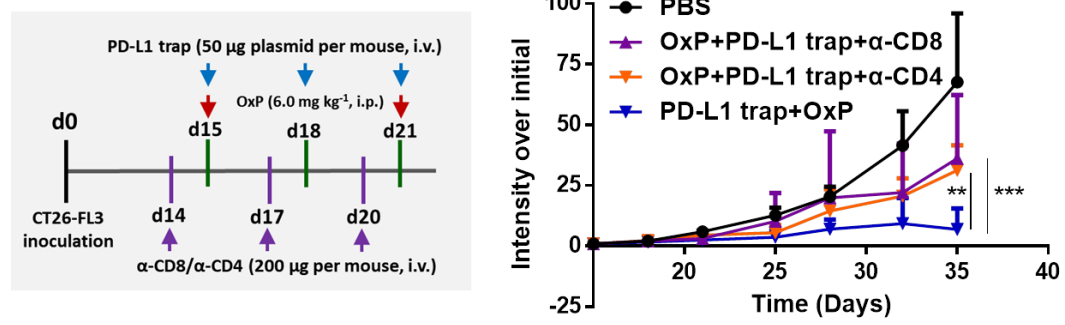

**Supplementary Figure 8.** Orthotopic CT26-FL3 tumor growth curves of the PBS, OxP+PD-L1 or combined with  $\alpha$ -CD8/ $\alpha$ -CD4 groups (n = 5 mice per group). Significant differences were assessed using two-way ANOVA. Results are presented as mean (SD). \*\* P < 0.01, \*\*\* P < 0.001.



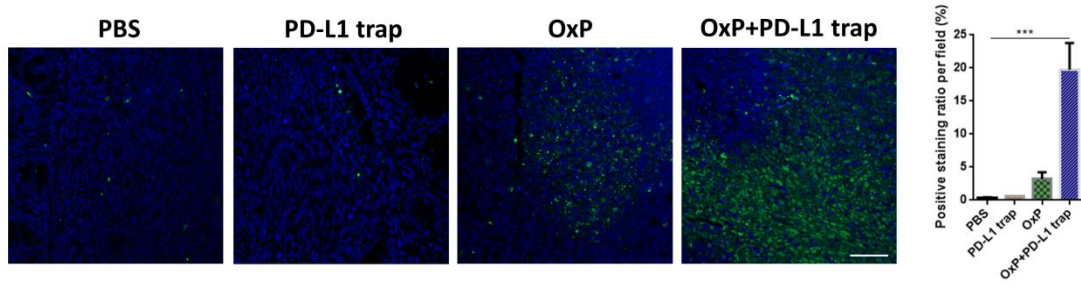

**Supplementary Figure 9.** TUNEL staining of the PBS, PD-L1 trap, OxP and OxP+PD-L1 trap treated CT26-FL3 tumor tissues on day 28. Positive ratios were quantified in 3 randomly selected fields per mouse (n = 4 mice per group). Scale bar represents 50  $\mu$ m. Significant differences were assessed using t test. Results are presented as mean (SD). \*\*\* P < 0.001.

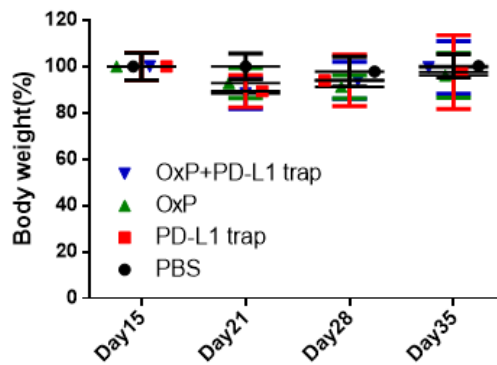

**Supplementary Figure 10.** Body weight over initial of the orthotopic CT26-FL3 tumor-bearing mice in PBS, PD-L1 trap, OxP and OxP+PD-L1 trap treated groups (n = 5).



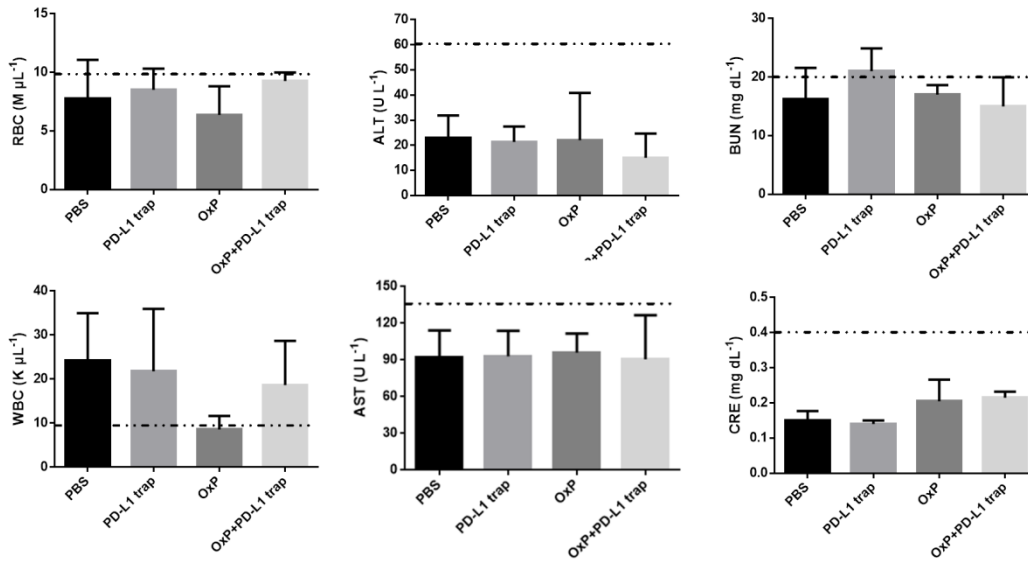

**Supplementary Figure 11.** Complete blood count and blood chemistry analysis of the orthotopic CT26-FL3 tumor bearing mice after various treatments. Measurements were carried out on day 28 (n = 3).

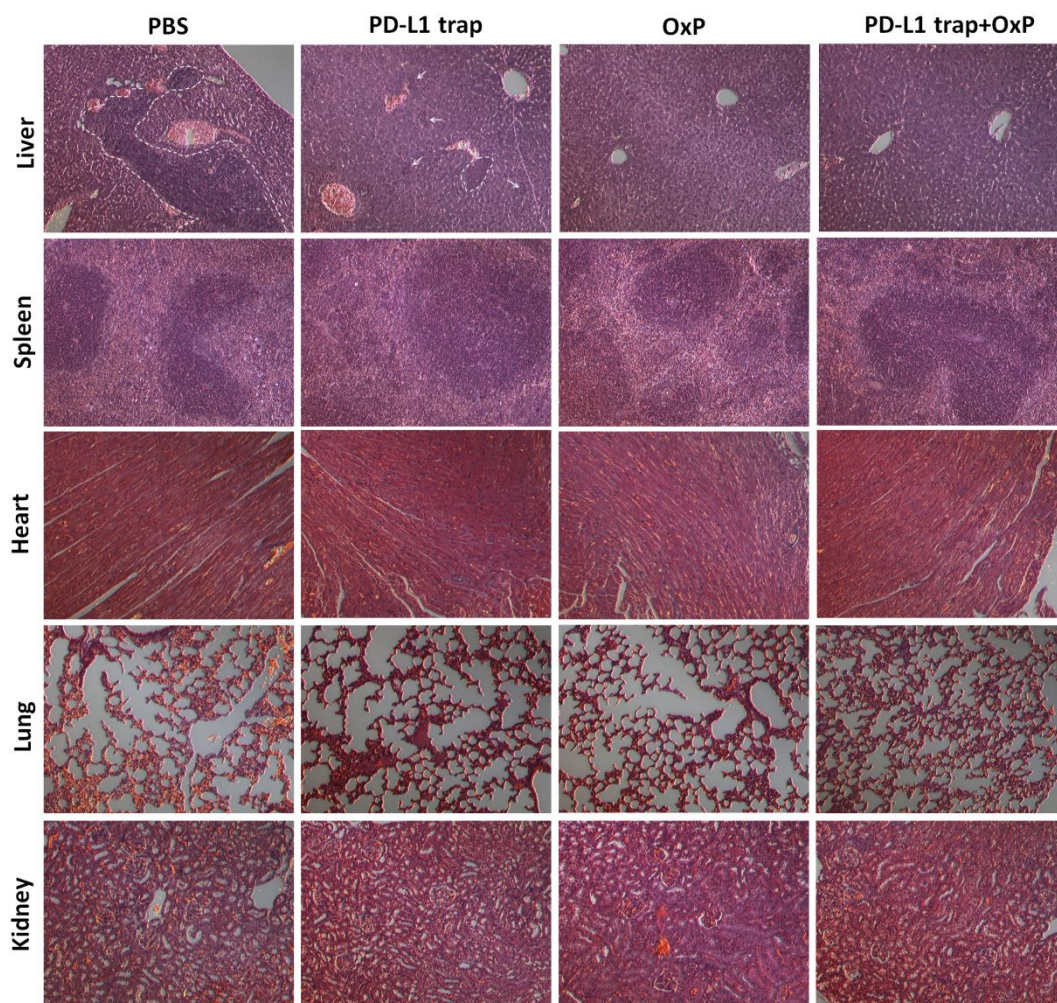

**Supplementary Figure 12.** Pathological analyses of liver, spleen, heart, lung and kidney of the CT26-FL3 tumor-bearing mice in the PBS, PD-L1 trap, OxP and OxP+PD-L1 trap treated groups on day 28. The regions in the white lines or sites pointed by white arrows in liver are metastasis sites. The photos were taken at 20× magnification.

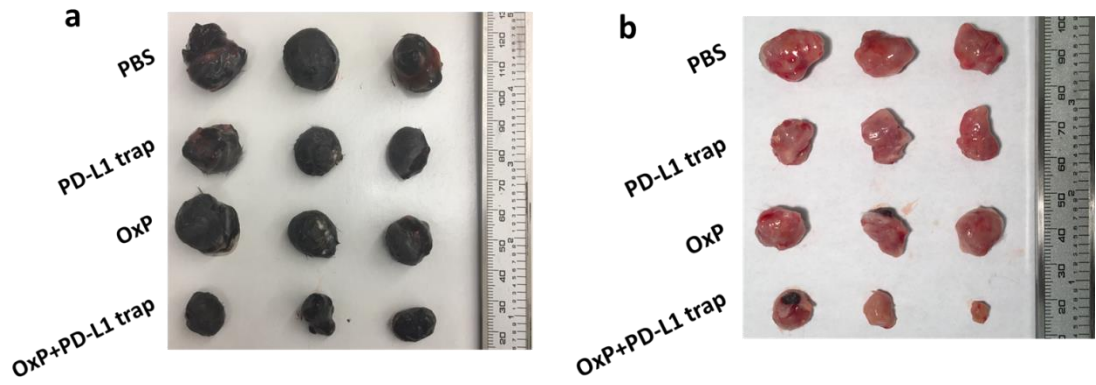

**Supplementary Figure 13.** Representative images of the B16F10 (a) and 4T1 (b) tumors at the end of observation.

## Supplementary Tables

**Supplementary Table 1.** Antibodies used in the study.

| <b>Antibodies</b>                                   | <b>Company</b> | <b>Catalog No.</b> | <b>Application</b> | <b>Dilution fold</b> |
|-----------------------------------------------------|----------------|--------------------|--------------------|----------------------|
| Alexa Fluor <sup>®</sup> 488 Anti-CD45              | BioLegend      | 103122             | IF                 | 200                  |
| Alexa Fluor <sup>®</sup> 647 Anti-CD3               | BioLegend      | 100209             | IF                 | 200                  |
| Alexa Fluor <sup>®</sup> 594 Anti-CD11c             | BioLegend      | 117346             | IF                 | 200                  |
| Alexa Fluor <sup>®</sup> 594 Anti-CD4               | BioLegend      | 100446             | IF                 | 200                  |
| Alexa Fluor <sup>®</sup> 488 Anti-FoxP3             | BioLegend      | 126406             | IF                 | 200                  |
| Alexa Fluor <sup>®</sup> 594 Anti-F4/80             | BioLegend      | 123140             | IF                 | 200                  |
| FITC Anti-NK1.1                                     | BioLegend      | 108706             | IF                 | 200                  |
| Alexa Fluor <sup>®</sup> 594 Anti-Gr1               | BioLegend      | 108448             | IF                 | 200                  |
| Alexa Fluor <sup>®</sup> 488 Anti-CD11b             | BioLegend      | 101217             | IF                 | 200                  |
| APC Anti-IL-10                                      | BioLegend      | 505010             | IF                 | 200                  |
| Anti-HMGB1                                          | Abcam          | ab18256            | IF                 | 500                  |
| Anti-CRT                                            | Abcam          | ab2907             | IF                 | 500                  |
| Goat Anti-Rabbit IgG, Alexa Fluor <sup>®</sup> 594  | Abcam          | Ab150080           | IF                 | 500                  |
| Alexa Fluor <sup>®</sup> 594 Anti-CD8a              | BioLegend      | 100758             | Flow               | 500                  |
| PE Anti-CD206                                       | BioLegend      | 141706             | Flow               | 500                  |
| APC Anti-DC Marker                                  | BioLegend      | 124913             | Flow               | 500                  |
| APC-Cy7 Anti-CD3e                                   | BioLegend      | 557596             | Flow               | 500                  |
| BV605 Anti-CD274                                    | BioLegend      | 329724             | IF, Flow           | 200, 500             |
| APC Anti-mouse IL-17A                               | BioLegend      | 506916             | Flow               | 500                  |
| PerCP Anti-CD45                                     | BD Pharmingen  | 550994             | Flow               | 500                  |
| FITC Anti-CD4                                       | Santa Cruz     | D3010              | Flow               | 500                  |
| Purified anti-human CD3                             | Biolegend      | 300301             | IF, IHC            | 200                  |
| Donkey Anti-mouse IgG, Alexa Fluor <sup>®</sup> 594 | Abcam          | Ab150108           | IF                 | 200                  |

IF: immunofluorescence. IHC: immunohistochemistry. Flow: Flow cytometry.

**Supplementary Table 2.** Primers used in this study

| <b>Primer</b>       | <b>Applied Biosystems</b> |
|---------------------|---------------------------|
| Mouse GAPDH         | Mm99999915_g1             |
| Mouse IFN- $\gamma$ | Mm01168134_m1             |
| Mouse TNF- $\alpha$ | Mm00443260_g1             |
| Mouse IL4           | Mm00445259_m1             |
| Mouse IL10          | Mm01288386_m1             |
| Mouse CXCL10        | Mm00445235_m1             |
| Mouse CXCL9         | Mm00434946_m1             |
| Mouse CCL2          | Mm00441242_m1             |
| Mouse CXCL12        | Mm00445553_m1             |
| Mouse CXCL13        | Mm04214185_s1             |

**Supplementary Note 1.** Nucleic acid sequences coding the open reading frame of the mouse PD-L1 trap (\*).

ATGAAATGGGTCACCTTTATCAGCCTGCTGTTCCCTGTTTCAGCAGCGCCTACTCTGGATC  
CTGGCTGCTGGAAGTGCCTAACGGCCCTTGGAGAAGCCTGACATTCTACCCTGCCTGG  
CTGACCGTGTCTGAGGGCGCTAACGCCACCTTCACATGCAGCCTGAGCAATTGGAGCG  
AGGACCTGATGCTGAACTGGAATAGACTGAGCCCCAGCAACCAGACCGAGAAGCAGG  
CCGCTTTCTGCAACGGACTGTCTCAGCCTGTGCAGGACGCCAGATTCCAGATCATCCA  
GCTGCCTAACAGACACGACTTCCACATGAACATCCTGGACACCAGAAGAAACGACAG  
CGGCATCTACCTGTGCGGGCCATCTCTCTGCACCCCAAGGCTAAGATCGAGGAATCTC  
CTGGCGCTGAGCTGGTGGTCACCGAGAGAATTCTTGAAGGCCCGCAACCGCAACCGA  
AACCGCAGCCGAAACCGGAACCGGAACCGCAACCGCAAGGCGGTTCTGAGGAAGAC  
CCCTGTGCCTGTGAGTCCATACTGAAATTTGAGGCCAAGGTGGAGGGTCTGCTGCAGG  
CCCTGACCAGGAAGCTGGAAGCTGTGAGCGGGCGGCTGGCTGTCCTGGAGAACAGAA  
TCATCGCGGCCGCTGGCGCCCCTGTGCCTTATCCTGATCCCCTGGAACCTAGAGGCGGC  
AGCCACCACCACCATCACCCTGA

\*: From PCT/US2016/051966
